# Supplementary material for: Redox-responsive UCNPs-DPA conjugated NGO-PEG-BPEI-DOX for imaging-guided PTT and chemotherapy for cancer treatment
Source: Royal Society of Chemistry journal article supplement (doi:10.1039/c7dt04093h), 2018-01-01
Supplement: c7dt04093h1.pdf [file c7dt04093h1.pdf]

## Redox responsive UCNPs-DPA conjugated NGO-PEG-BPEI for cancer theranostic

Arif Gulzar,<sup>\*a</sup> Jiating Xu,<sup>a</sup> Liangge Xu,<sup>a</sup> Shili Gai,<sup>\*a</sup> Piaoping Yang,<sup>\*a</sup> Fei He,<sup>a</sup> Dan Yang,<sup>a</sup> Guanghui An,<sup>a</sup> Mohd Bismillah Ansari<sup>b</sup>

<sup>a</sup>Key Laboratory of Superlight Materials and Surface Technology, Ministry of Education, College of Material Sciences and Chemical Engineering, Harbin Engineering University, Harbin, 150001, P. R. China

<sup>b</sup>Saudi Basic Industries Kingdom of Saudi Arabia

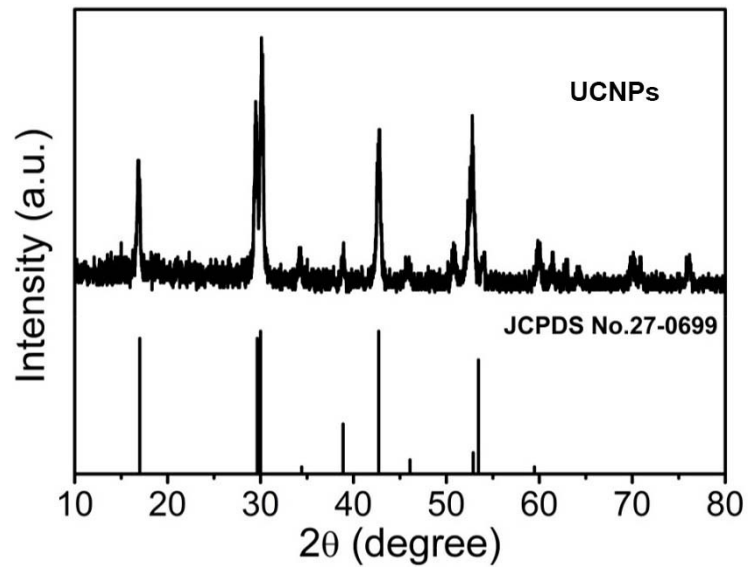

**Fig. S1** XRD pattern of UCNPs. The standard pattern of hexagonal phases  $\text{NaGdF}_4:\text{Yb}^{3+}, \text{Er}^{3+}$ @ $\text{NaGdF}_4$  is given for reference (JCPDS No.27-0699).

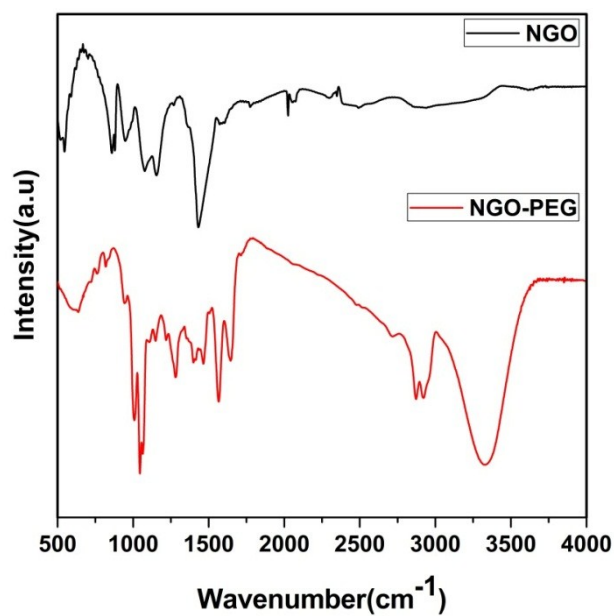

**Fig. S2** FT-IR spectra of NGO-PEG and NGO. The strong stretching vibration peak of C-H ( $\sim 2880\text{ cm}^{-1}$ ) demonstrated the presence of PEG in the NGO-PEG. The appearance of the new absorption at  $\sim 1649\text{ cm}^{-1}$  for  $-\text{CONH}-$  further indicated that PEG has been covalently bonded on the surface of NGO successfully.

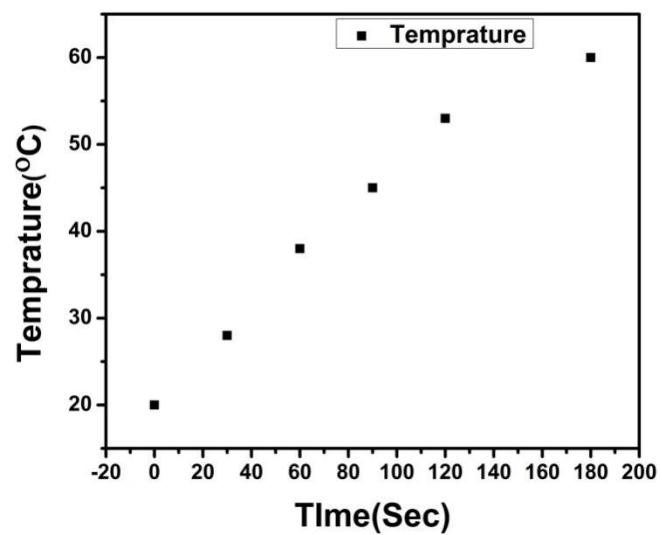

**Fig. S3** Temperature variation curves of the NGO-PEG solution subjected to the 980 nm laser at a power density of 0.72 W/cm<sup>2</sup>.

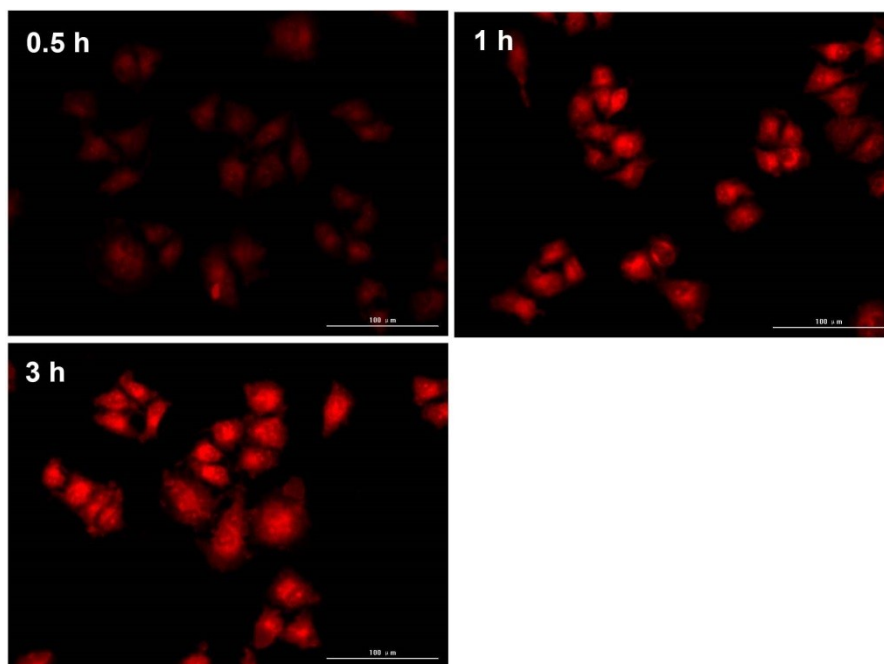

**Fig. S4** LSUCLM images of HeLa cells when incubating with UCNPs-DPA-NGO-PEG-BPEI-DOX for 0.5 h, 1 h, and 3 h.

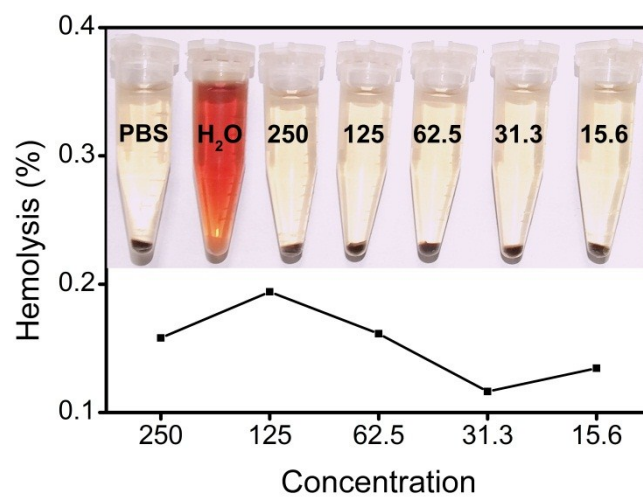

**Fig. S5** Hemolytic assay of UCNPs-DPA-NGO-PEG-BPEI-DOX by human red blood cells.

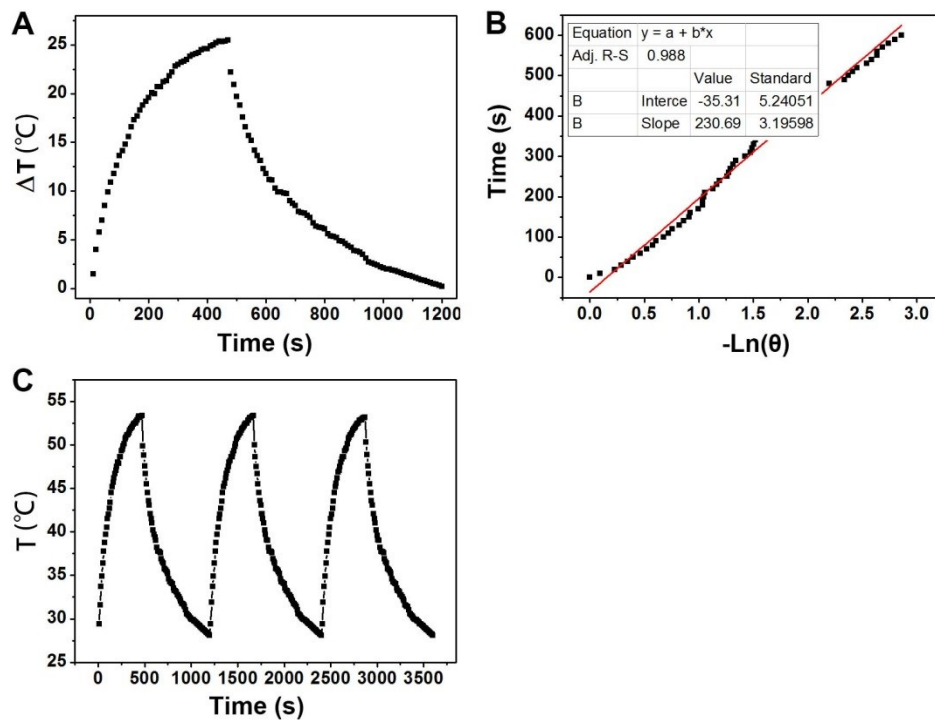

**Fig. S6** (A) The photothermal response of the UCNPs-DPA-NGO-PEG-BPEI-DOX aqueous solution ( $200 \mu\text{g}/\text{mL}$ ) radiated with  $980 \text{ nm}$  laser ( $0.72 \text{ W}/\text{cm}^2$ ) and then the laser was shut off. (B) Linear time data *versus*  $-\ln \theta$  obtained from the cooling period of Fig. S6A. (C) Temperature change of UCNPs-DPA-NGO-PEG-BPEI-DOX under three irradiation/cooling cycles ( $0.72 \text{ W}/\text{cm}^2$ ).
